# Supplementary material for: Chemerin attenuates acute kidney injury by inhibiting ferroptosis via the AMPK/NRF2/SLC7A11 axis
Source: PubMed Central journal article supplement — Commun Biol. 2024 Dec 19;7:1679. doi: 10.1038/s42003-024-07377-x (PMC11659585; doi:10.1038/s42003-024-07377-x), 2024-12-19
Supplement: 42003_2024_7377_MOESM4_ESM.pdf [file 42003_2024_7377_MOESM4_ESM.pdf]

## Description of Additional Supplementary Files

**File name:** Supplementary Data 1

**Description:** The source data behind the graphs in the paper.
